# Supplementary material for: An investigation of broadband optical nonlinear absorption and transient nonlinear refraction in a fluorenone-based compound
Source: Royal Society of Chemistry journal article supplement (doi:10.1039/d1ra01134k), 2021-01-01
Supplement: d1ra01134k1.pdf [file d1ra01134k1.pdf]

## Supplementary information

### Investigation of broadband optical nonlinear absorption and transient nonlinear refraction in a fluorenone-based compound

*Xingzhi Wu*<sup>a,\*</sup>, *Jinchong Xiao*<sup>b</sup>, *Yanbing Han*<sup>c</sup>, *Jiabei Xu*<sup>a</sup>, *Wenfa Zhou*<sup>c</sup>, *Yang Li*<sup>a,,</sup>, *Yu Fang*<sup>a</sup>,  
*Yongqiang Chen*<sup>a</sup>, *Quanying Wu*<sup>a</sup> and *Yinglin Song*<sup>c,d,\*</sup>

<sup>a</sup> Jiangsu Key Laboratory of Micro and Nano Heat Fluid Flow Technology and Energy Application, School of Physical Science and Technology, Suzhou University of Science and Technology, Suzhou 215009, China

<sup>b</sup> College of Chemistry and Environment Science, Key Laboratory of Chemical Biology of Hebei Province, Hebei University, Baoding 071002, China

<sup>c</sup> Department of Physics, Harbin institute of technology, Harbin 150001, China

<sup>d</sup> Department of Physics, Soochow University, Suzhou 215123, China

#### **Corresponding Author**

\*E-mail: [wuxingzhi@usts.edu.cn](mailto:wuxingzhi@usts.edu.cn)

\* E-mail: [ylsong@hit.edu.cn](mailto:ylsong@hit.edu.cn)

#### 1. Characterization

Figure S1 <sup>1</sup>H NMR

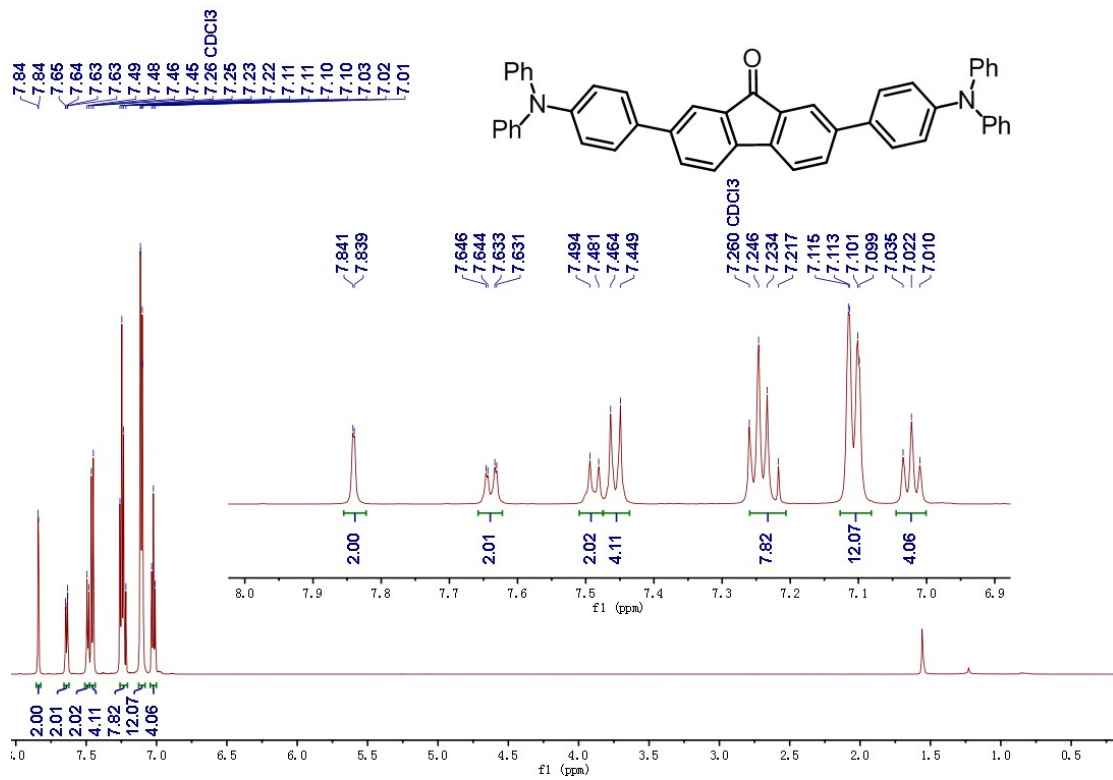

Figure S2 <sup>13</sup>C NMR

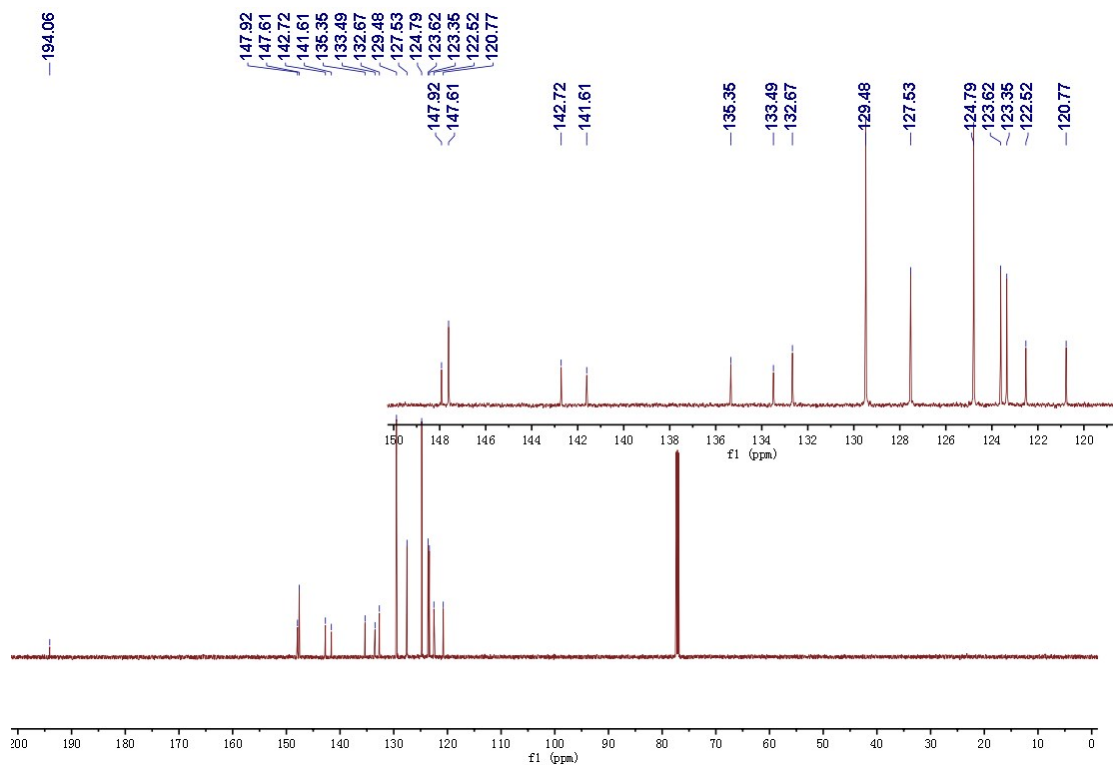

Figure S3 MS

## MALDI-TOF

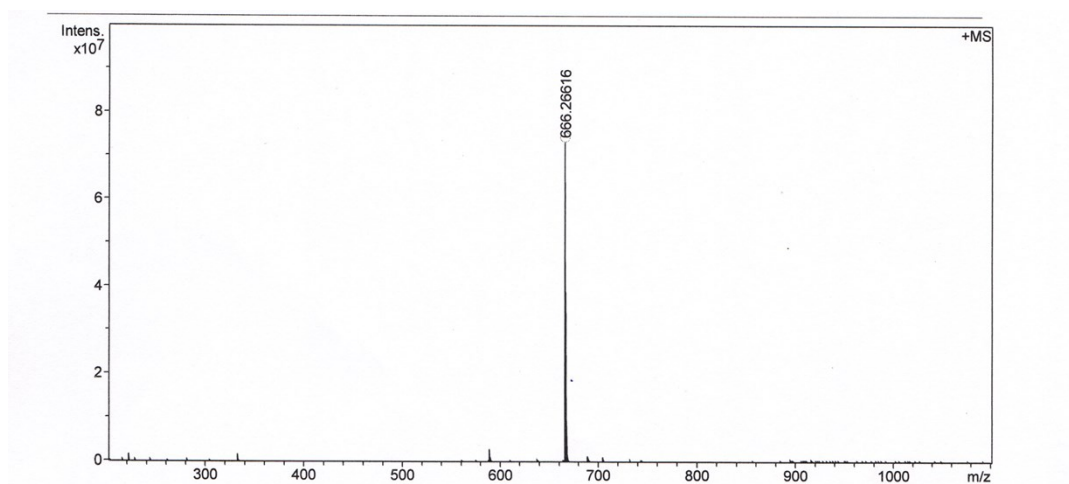

## HR-MS

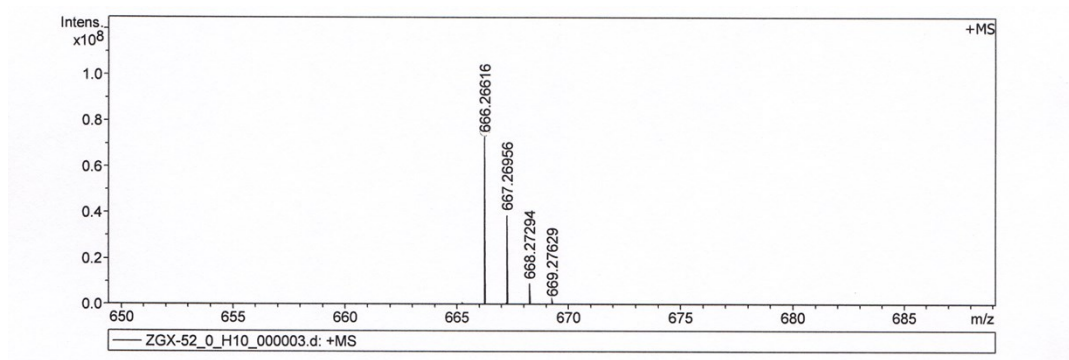

## 2. Transient absorption spectrum

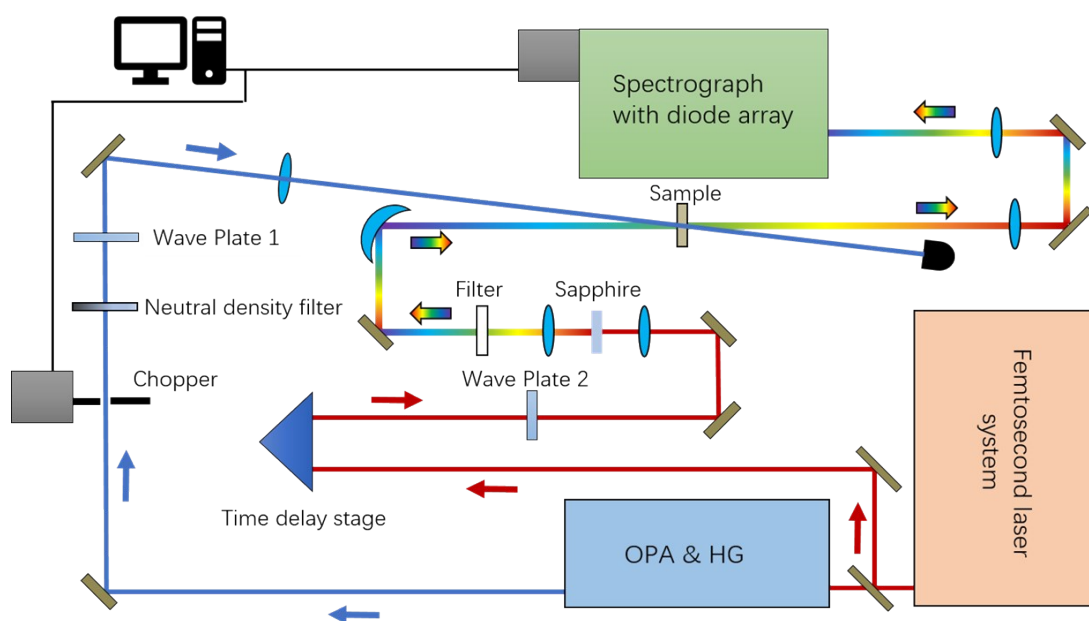

Figure S4 The experimental setup of TAS

### 3. Global and Target analysis of TAS

The total TAS ( $\psi(t, \lambda)$ ) could be numerically reconstruct with several components, which could be express as:

$$\psi(t, \lambda) = \sum_n c_n(t) \times \varepsilon_n(\lambda)$$

$c_n(t)$  and  $\varepsilon_n(\lambda)$  represent the concentration of time and the featured spectrum of each component n. As a result,  $c_n(t)$  could be expressed as lifetime  $\tau$  in single exponential decay  $c_n = \exp(-t/\tau_n)$  and the corresponding spectrum of each component could be extracted. The IRF here is given by the convolution of pump and probe pulses, which was estimated to be 0.2 ps. The details of TAS and global & target analysis could be found in Refs listed below.

[1] I.H.M. van Stokkum, D.S. Larsen, R. van Grondelle, Global and target analysis of time-resolved spectra, *Bba-Bioenergetics* 1657(2-3) (2004) 82-104.

[2] C. Ruckebusch, M. Sliwa, P. Pernot, A. de Juan, R. Tauler, Comprehensive data analysis of femtosecond transient absorption spectra: A review, *Journal of Photochemistry and Photobiology C: Photochemistry Reviews* 13(1) (2012) 1-27.

[3] R. Berera, R. van Grondelle, J.T.M. Kennis, Ultrafast transient absorption spectroscopy: principles and application to photosynthetic systems, *Photosynth Res* 101(2-3) (2009) 105-118.

### 4. Rate equations in POPP simulation

Simplified rate equations are built as follows:

$$\frac{dN_{S_0}}{dt} = -\frac{\sigma_{e,S_0} I_e N_{S_0}}{h\omega} - \frac{\beta I_e^2}{2h\omega} + \frac{N_{S_1}}{\tau_{S_1}}$$

$$\frac{dN_{S_3}}{dt} = \frac{\sigma_{e,S_0} I_e N_{S_0}}{h\omega} + \frac{\beta I_e^2}{2h\omega} - \frac{N_{S_3}}{\tau_{S_3}}$$

$$\frac{dN_{S_2}}{dt} = \frac{N_{S_3}}{\tau_{S_3}} - \frac{N_{S_2}}{\tau_{S_2}}$$

$$\frac{dN_{S_1}}{dt} = \frac{N_{S_2}}{\tau_{S_2}} - \frac{N_{S_1}}{\tau_{S_1}}$$

With  $N_{S_n}$  represents the population density of effective energy state  $S_n$ .  $\sigma_{e,S_n}$  and  $\sigma_{p,S_n}$  are absorptive cross section of  $S_n$  for pump beam and probe beam,  $\beta$  is the two-photon absorption coefficient.  $I_e$  and  $I_p$  stand for pump intensity and probe intensity.  $\tau_n$  represents lifetimes of each effective state. We assume that electrons are only pumped from ground state to the LE state  $S_2$  during the pulse time. After the effect of pump pulse, excited state electrons decay to  $S_1$  and finally relax to ground state  $S_0$ .

And the modulation on intensity ( $I_p$ ) and phase ( $\varphi_p$ ) of the probe beam can be represented as:

$$\frac{dI_p}{dz} = -\left(\sum_{n \geq 1} \sigma_{p,S_n} N_{S_n} + 2\beta I_e\right) I_p$$

$$\frac{d\varphi_p}{dz} = k\left(\sum_{n \geq 1} \Delta\eta_{p,S_n} N_{S_n} + 2n_2 I_e\right)$$
